# Supplementary material for: Naphthyridinedione-based multifunctional small molecules for applications in both photovoltaics and transistors
Source: Royal Society of Chemistry journal article supplement (doi:10.1039/d4tc01785d), 2024-01-01
Supplement: d4tc01785d1.pdf [file d4tc01785d1.pdf]

## Supplementary Information

### **Naphthyridinedione-based multifunctional small molecules for both photovoltaics and transistors application**

*Min-Woo Choi*<sup>\*†<sup>a</sup></sup>, *Sungjin Park*<sup>†<sup>a</sup></sup>, *Su-Yeon Kim*<sup>a</sup>, *Dong Won Kim*<sup>a</sup>, *Seong Il Kim*<sup>a</sup>, *Won Sik Yoon*<sup>a</sup> and *Soo Young Park*<sup>\*ab</sup>

<sup>a</sup> Laboratory for Supramolecular Optoelectronic Materials, Department of Materials Science and Engineering, Seoul National University, 1 Gwanak-ro, Gwanak-gu, Seoul 08826, Korea.  
E-mail: choiminoo@snu.ac.kr

<sup>b</sup> Research Institute of Advanced Materials, Institute of Engineering Research, Seoul National University, 1 Gwanak-ro, Gwanak-gu, Seoul 08826, Korea.  
E-mail: parksy@snu.ac.kr

† These authors contributed equally to this work.

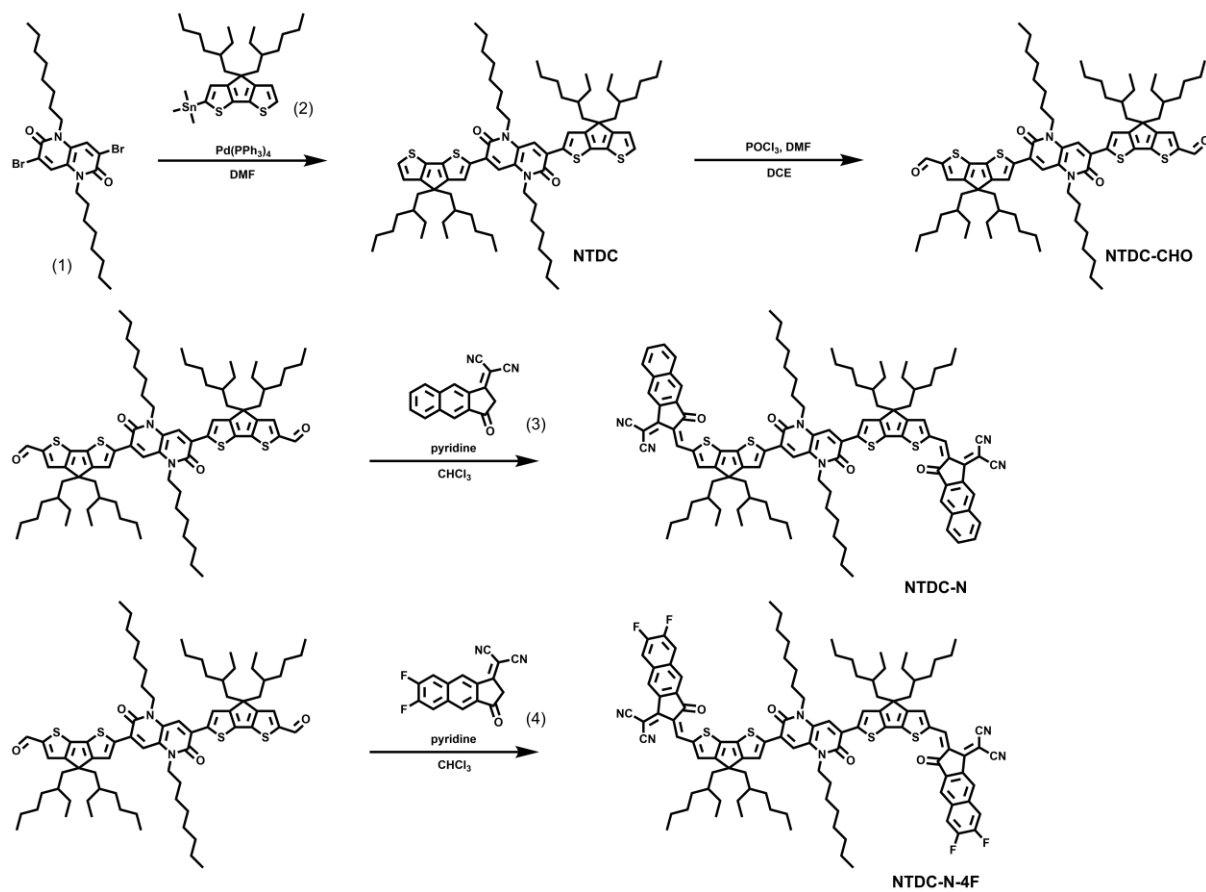

**Scheme S1** Synthetic route of NTDC-N and NTDC-N-4F.

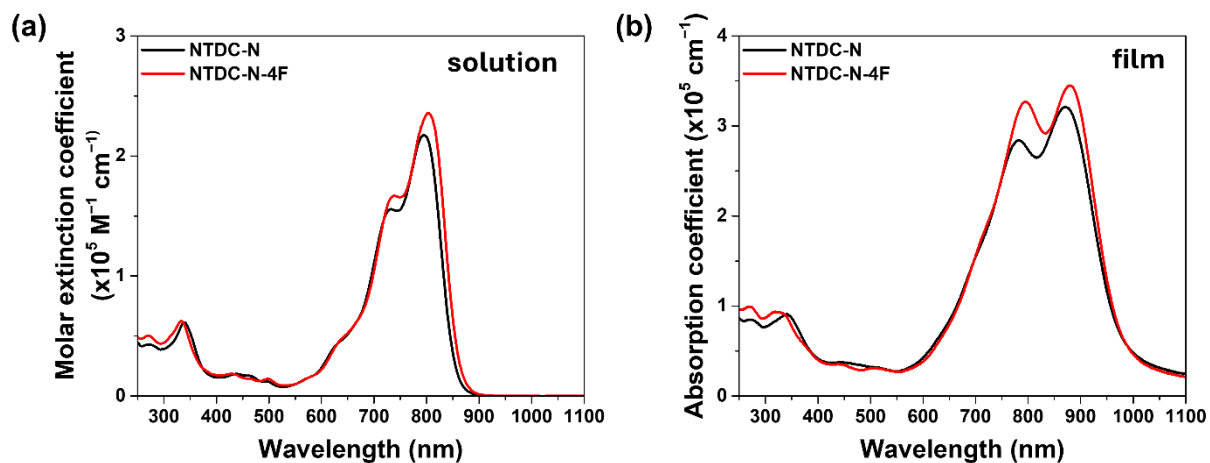

**Fig. S1** (a) Molar extinction coefficients in 10  $\mu\text{M}$   $\text{CHCl}_3$  solution and (b) Absorption coefficient in thin film of NTDC-N and NTDC-N-4F.

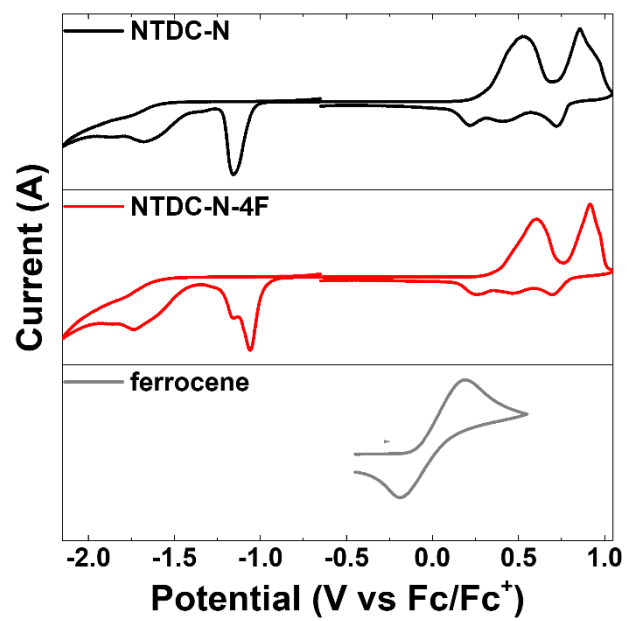

**Fig. S2** Cyclic voltammograms of NTDC-N, NTDC-N-4F, and ferrocene.

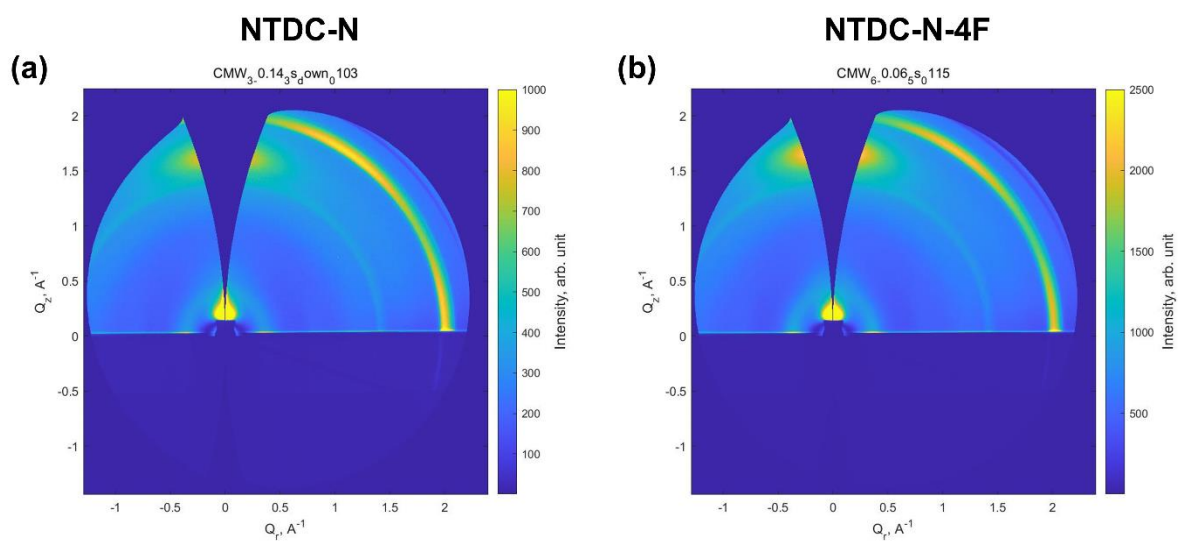

**Fig. S3** 2D GIWAXS patterns of (a) NTDC-N and (b) NTDC-N-4F neat films. The faint ring patterns around  $q = 1.5 \text{ \AA}^{-1}$  and the bright ring patterns around  $q = 2 \text{ \AA}^{-1}$  are originated from ITO substrates.

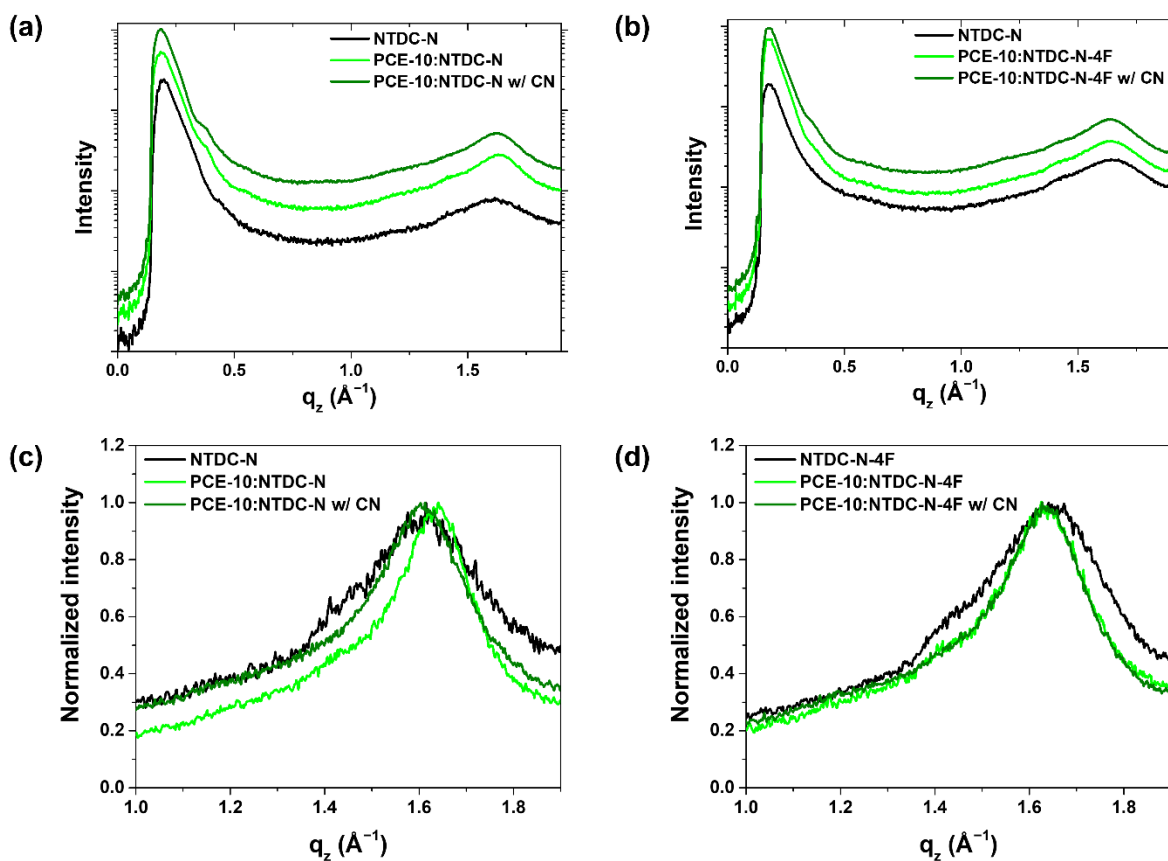

**Fig. S4** Out-of-plane linecuts of GIWAXS patterns of pristine acceptor films, polymer:acceptor blend films, and polymer:acceptor blend films w/ CN. (a and c) NTDC-N and (b and d) NTDC-N-4F. Normalized peaks near  $\pi$ - $\pi$  stacking pattern of films are described on (c) NTDC-N and (d) NTDC-N-4F.

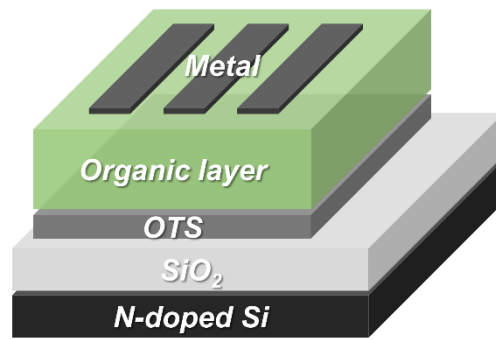

**Fig. S5** Device structure of OFET devices.

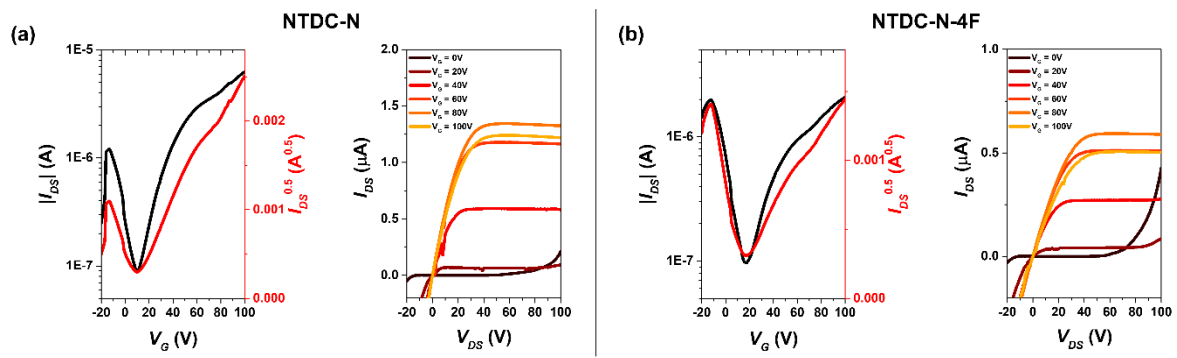

**Fig. S6** Representative transfer (left side of (a and b),  $V_{DS} = 100$  V) and output curves (right side of (a and b),  $V_G = -100$  V) for top-contact bottom-gate  $n$ -channel mode OFETs with Al electrode of (a) NTDC-N and (b) NTDC-N-4F. Substrate temperature is  $110^\circ\text{C}$ . Channel width ( $W$ ) and length ( $L$ ) are  $100\ \mu\text{m}$  and  $1\ \text{mm}$ , respectively.



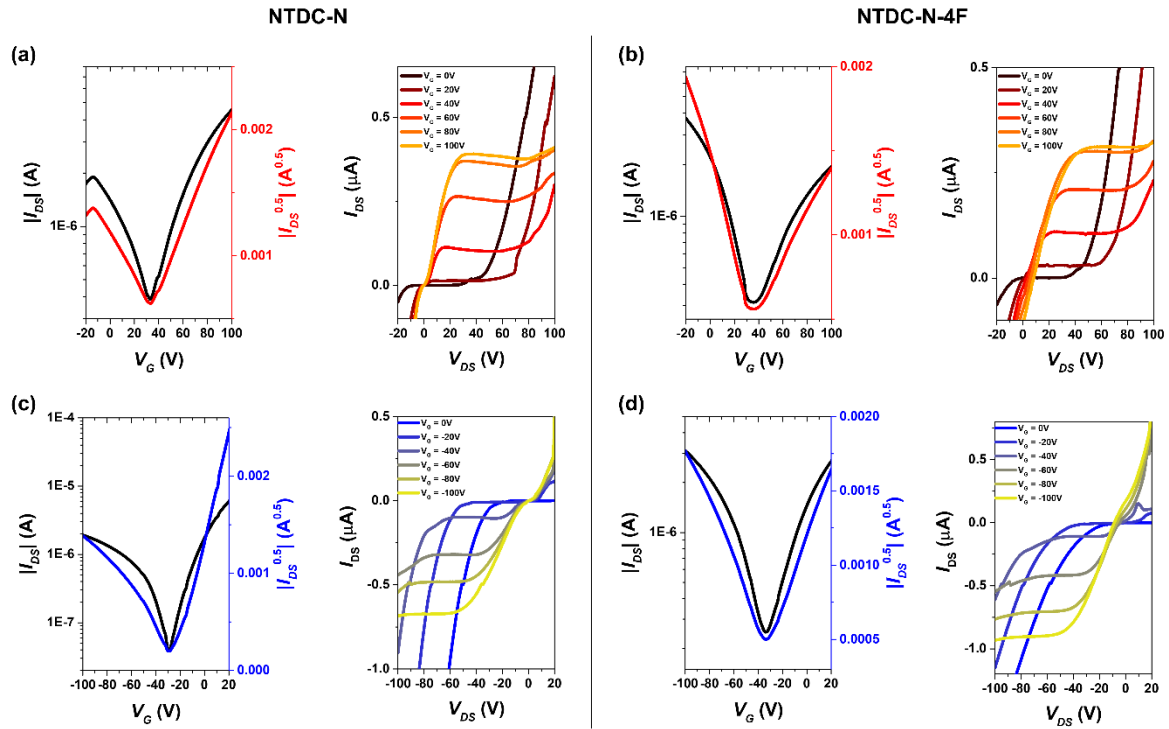

**Fig. S7** Representative transfer (left,  $V_{DS} = 100$  V for  $n$ -channel mode and  $V_{DS} = -100$  V for  $p$ -channel mode) and output curves (right,  $V_G = -100$  V  $n$ -channel mode and  $V_G = 100$  V for  $p$ -channel mode) for top-contact bottom-gate OFETs with Al electrode of (a and c) NTDC-N and (b and d) NTDC-N-4F.  $n$ -Channel mode and  $p$ -channel mode OFET characteristics are on the top (a and b) and the bottom (c and d), respectively. Channel width ( $W$ ) and length ( $L$ ) are  $100\ \mu\text{m}$  and  $1\ \text{mm}$ , respectively.

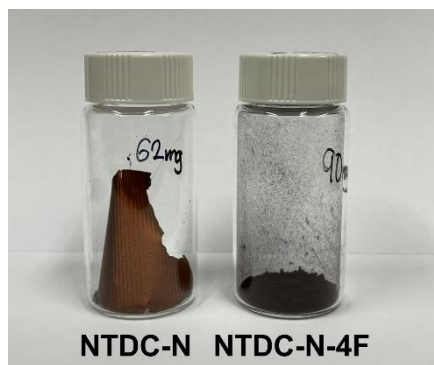

**Fig. S8** An image of NTDC-N and NTDC-N-4F.

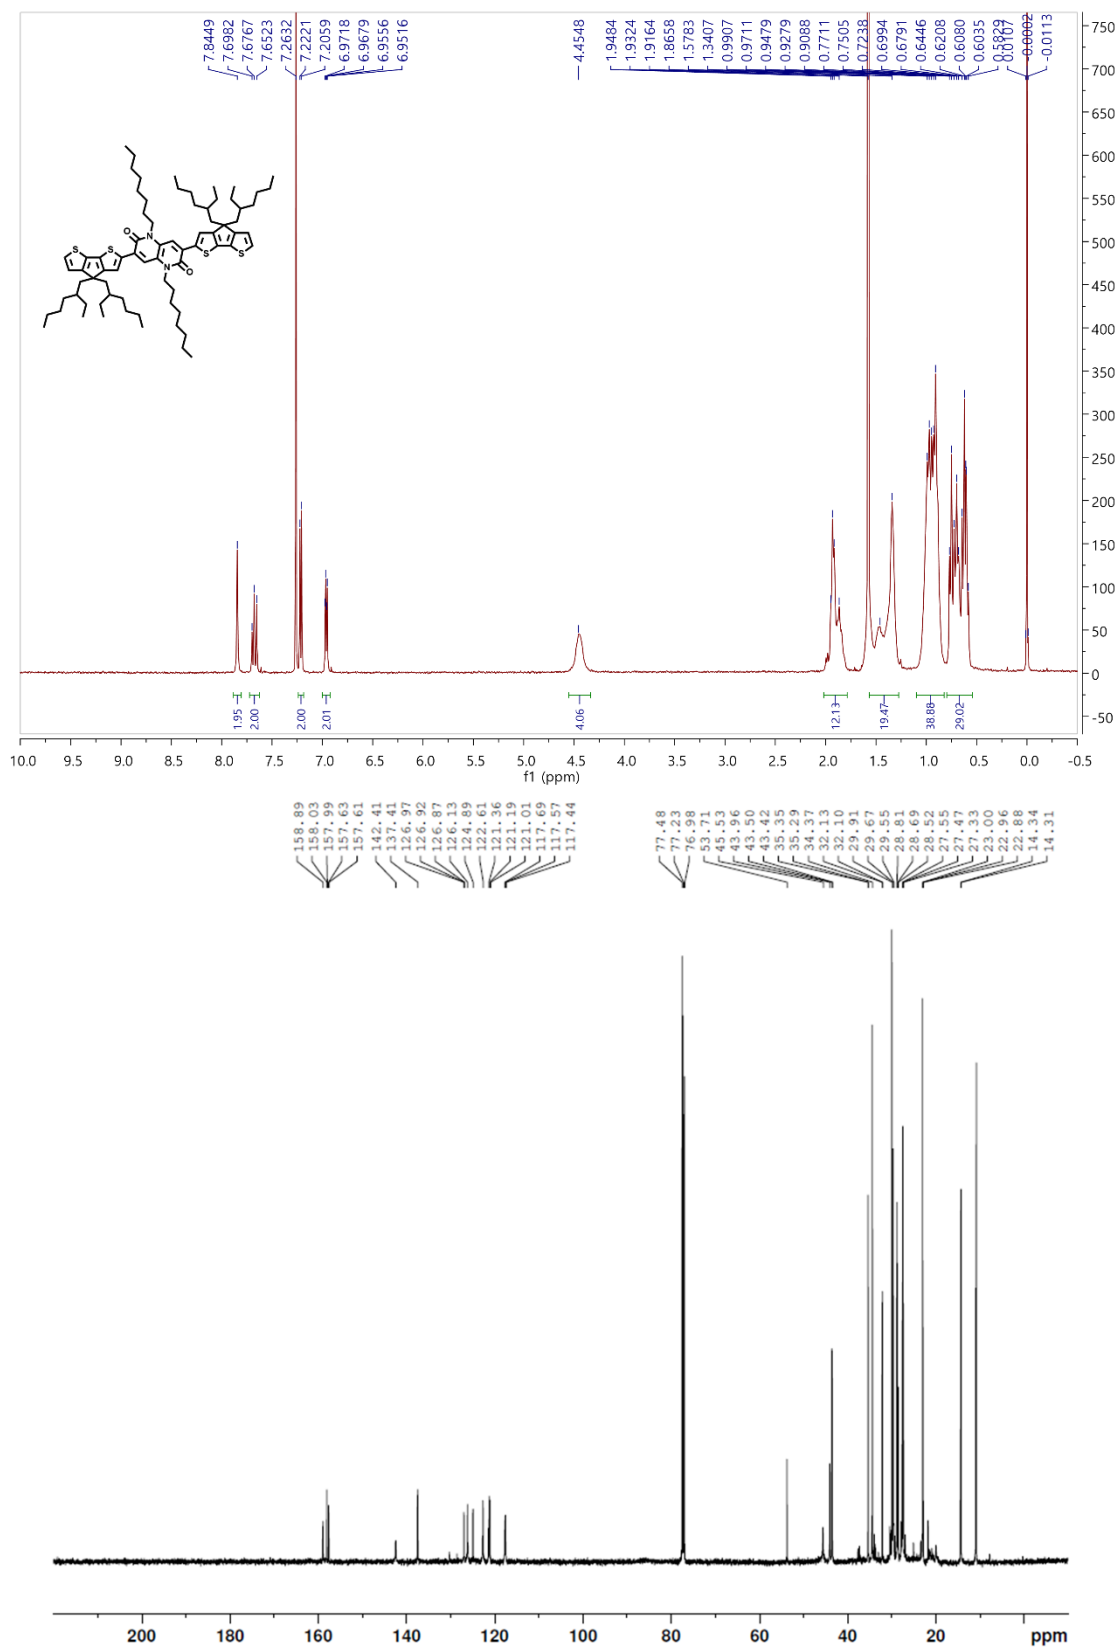

**Fig. S9** <sup>1</sup>H NMR and <sup>13</sup>C NMR spectra of NTDC (CDCl<sub>3</sub>).

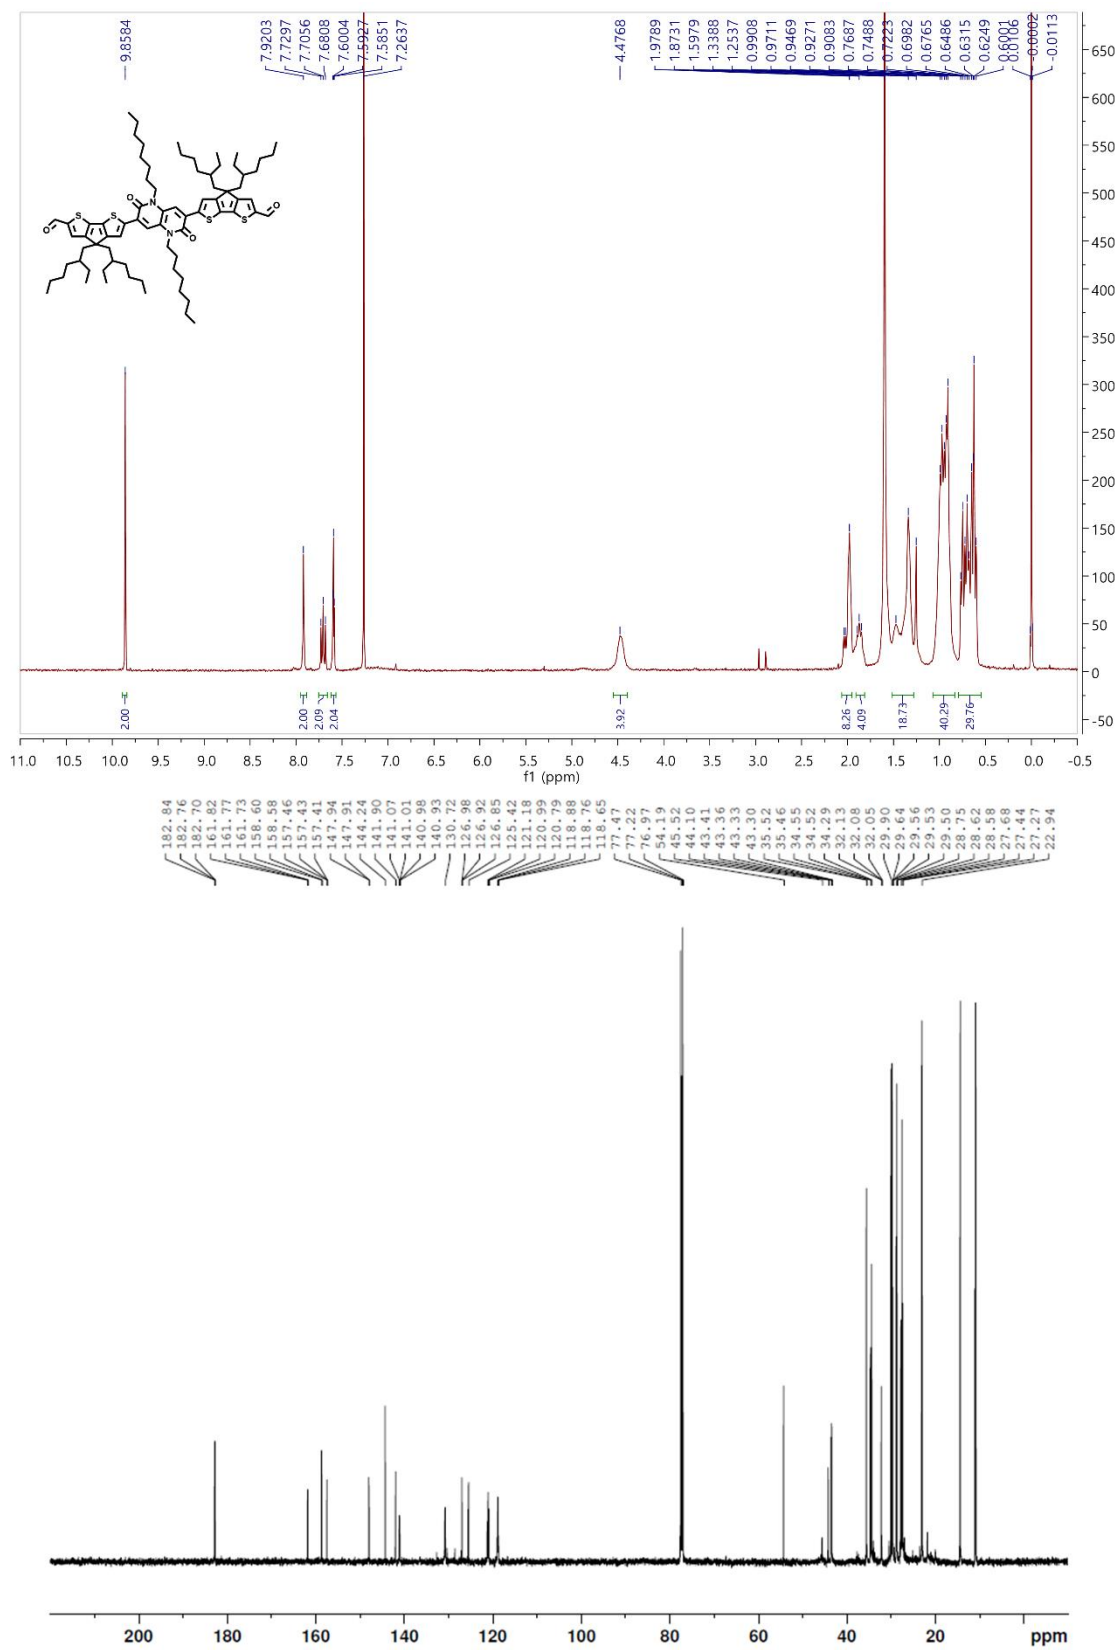

**Fig. S10** <sup>1</sup>H NMR and <sup>13</sup>C NMR spectra of NTDC-CHO (CDCl<sub>3</sub>).

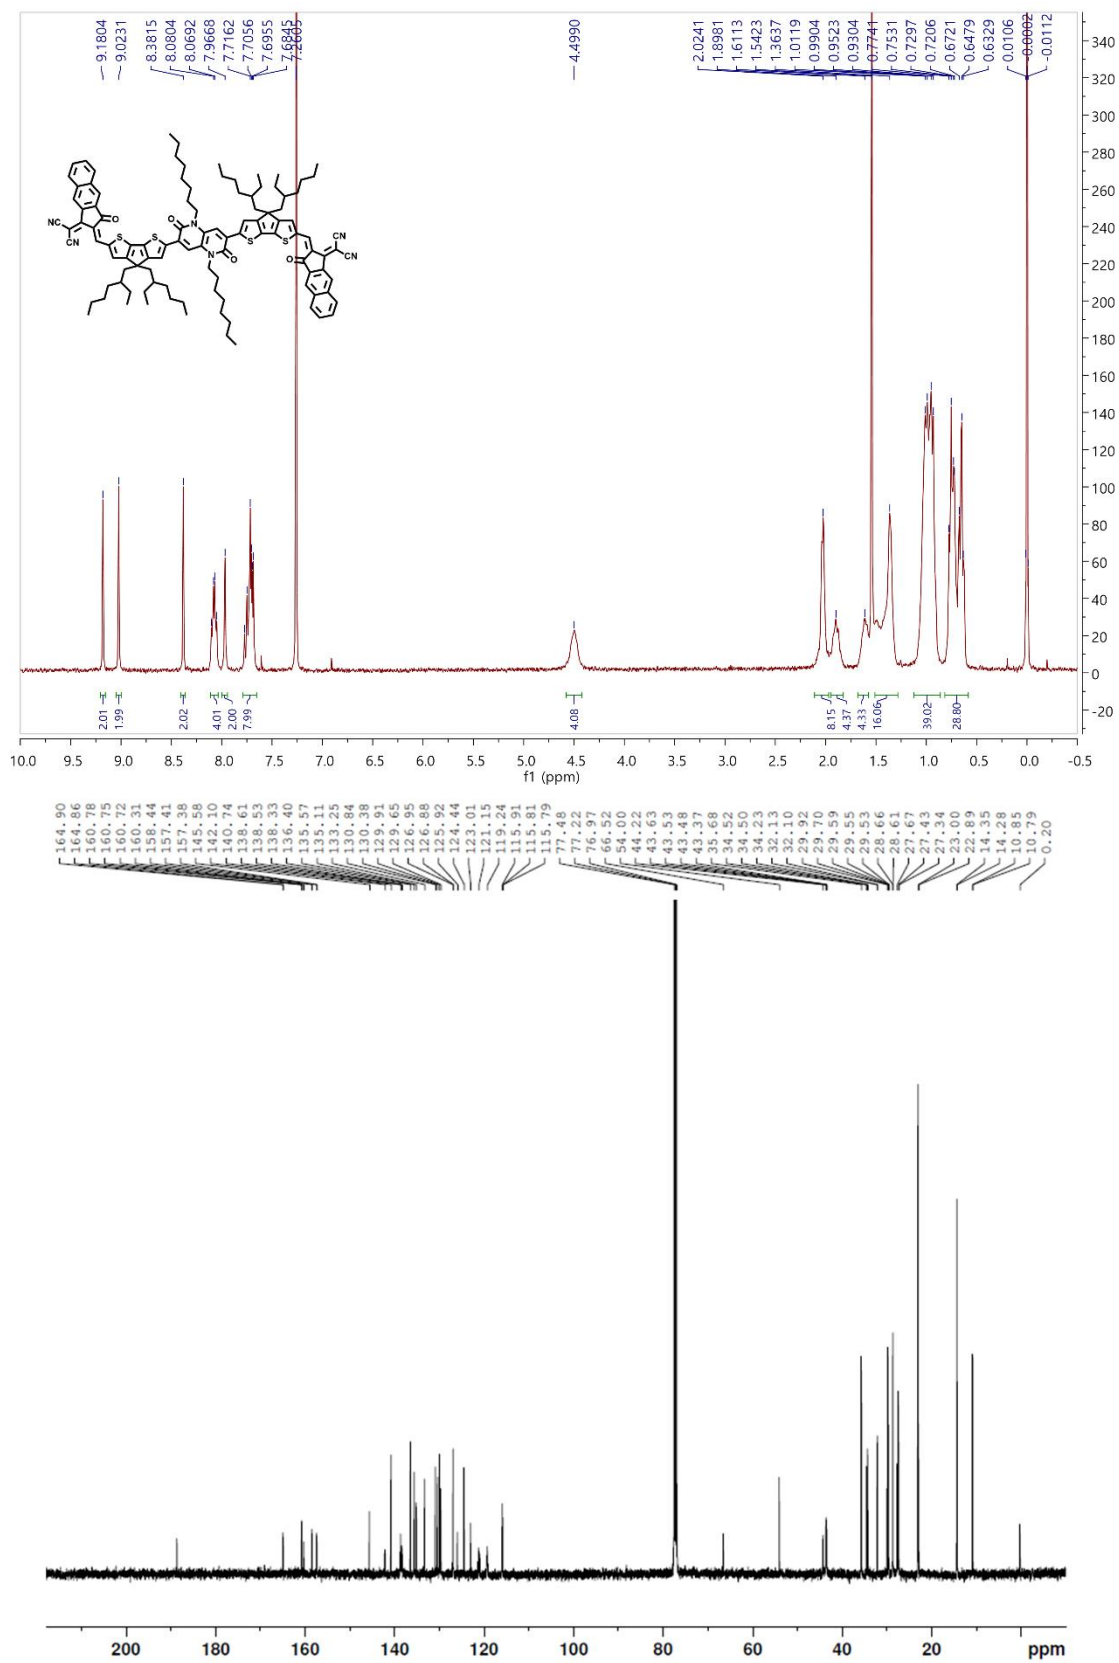

**Fig. S11** <sup>1</sup>H NMR and <sup>13</sup>C NMR spectra of NTDC-N (CDCl<sub>3</sub>).

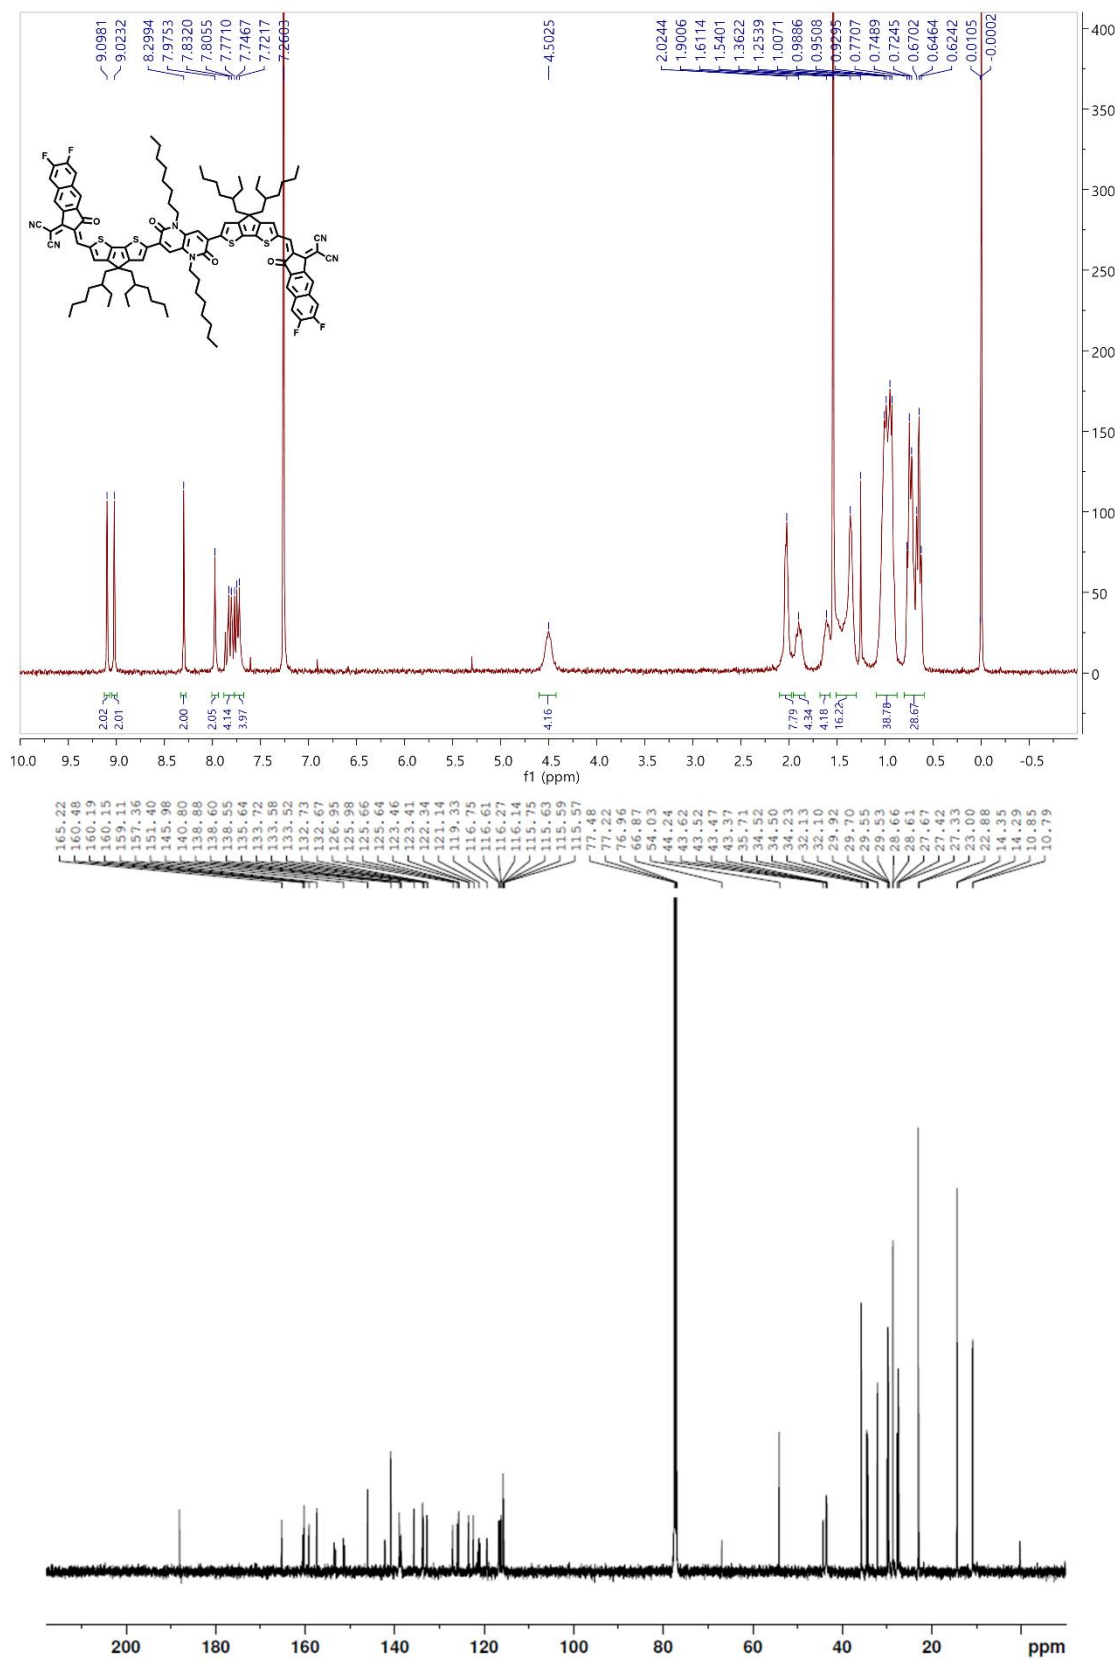

**Fig. S12** <sup>1</sup>H NMR and <sup>13</sup>C NMR spectra of NTDC-N-4F (CDCl<sub>3</sub>).

**Table S1** Device performances of OPV devices using different additives.

| BHJ              | Additive     | $V_{oc}$ [V] | $J_{sc}$ [mA cm <sup>-2</sup> ] | FF   | PCE [%] |
|------------------|--------------|--------------|---------------------------------|------|---------|
| PCE-10:NTDC-N    | -            | 0.71         | 18.97                           | 0.51 | 6.85    |
|                  | DPE 0.5 vol% | 0.71         | 13.97                           | 0.57 | 5.70    |
|                  | DIO 0.5 vol% | 0.70         | 9.26                            | 0.58 | 3.79    |
|                  | CN 0.5 vol%  | 0.71         | 19.52                           | 0.54 | 7.51    |
| PCE-10:NTDC-N-4F | -            | 0.65         | 20.49                           | 0.59 | 7.83    |
|                  | DPE 0.5 vol% | 0.63         | 19.87                           | 0.61 | 7.61    |
|                  | DIO 0.5 vol% | 0.64         | 17.60                           | 0.59 | 6.60    |
|                  | CN 0.5 vol%  | 0.64         | 20.08                           | 0.61 | 8.16    |

**Table S2** GIWAXS parameters of acceptors and blend films.

| Film                   | $q_z$ ( $\text{\AA}^{-1}$ ) | $\pi$ - $\pi$ stacking ( $\text{\AA}$ ) | FWHM ( $\text{\AA}^{-1}$ ) | CCL ( $\text{\AA}$ ) |
|------------------------|-----------------------------|-----------------------------------------|----------------------------|----------------------|
| NTDC-N                 | 1.6102                      | 3.90                                    | 0.2840                     | 22.12                |
| PCE-10:NTDC-N          | 1.6406                      | 3.83                                    | 0.1876                     | 33.49                |
| PCE-10:NTDC-N w/ CN    | 1.6048                      | 3.91                                    | 0.2209                     | 28.44                |
| NTDC-N-4F              | 1.6485                      | 3.81                                    | 0.2702                     | 23.25                |
| PCE-10:NTDC-N-4F       | 1.6349                      | 3.84                                    | 0.2021                     | 31.09                |
| PCE-10:NTDC-N-4F w/ CN | 1.6349                      | 3.84                                    | 0.2082                     | 30.18                |



**Table S3** Summary of OFET device performances according to substrate temperatures.

| Material  | Substrate temperature | $\mu_{e.avg}^a$<br>[cm <sup>2</sup> V <sup>-1</sup> s <sup>-1</sup> ] | $\mu_{e.max}^b$<br>[cm <sup>2</sup> V <sup>-1</sup> s <sup>-1</sup> ] |
|-----------|-----------------------|-----------------------------------------------------------------------|-----------------------------------------------------------------------|
| NTDC-N    | 25°C                  | $(1.67 \pm 0.25) \times 10^{-3}$                                      | $2.32 \times 10^{-3}$                                                 |
|           | 70°C                  | $(2.34 \pm 0.51) \times 10^{-3}$                                      | $3.14 \times 10^{-3}$                                                 |
|           | 110°C                 | $(1.05 \pm 0.17) \times 10^{-2}$                                      | $1.31 \times 10^{-2}$                                                 |
| NTDC-N-4F | 25°C                  | $(1.20 \pm 0.09) \times 10^{-3}$                                      | $1.31 \times 10^{-3}$                                                 |
|           | 70°C                  | $(1.79 \pm 0.17) \times 10^{-3}$                                      | $2.19 \times 10^{-3}$                                                 |
|           | 110°C                 | $(3.48 \pm 0.35) \times 10^{-3}$                                      | $4.21 \times 10^{-3}$                                                 |

<sup>a)</sup> Average electron mobility. <sup>b)</sup> Maximum electron mobility.
